# Supplementary material for: DAPT, a γ-Secretase Inhibitor, Suppresses Tumorigenesis, and Progression of Growth Hormone-Producing Adenomas by Targeting Notch Signaling
Source: PubMed Central journal article supplement (PMC6718711; doi:10.3389/fonc.2019.00809), 2019-08-27

**Figure S1** Notch pathways in GHoma according to IPA database. Upwards arrow: upregulation; Downwards arrow: downregulation.

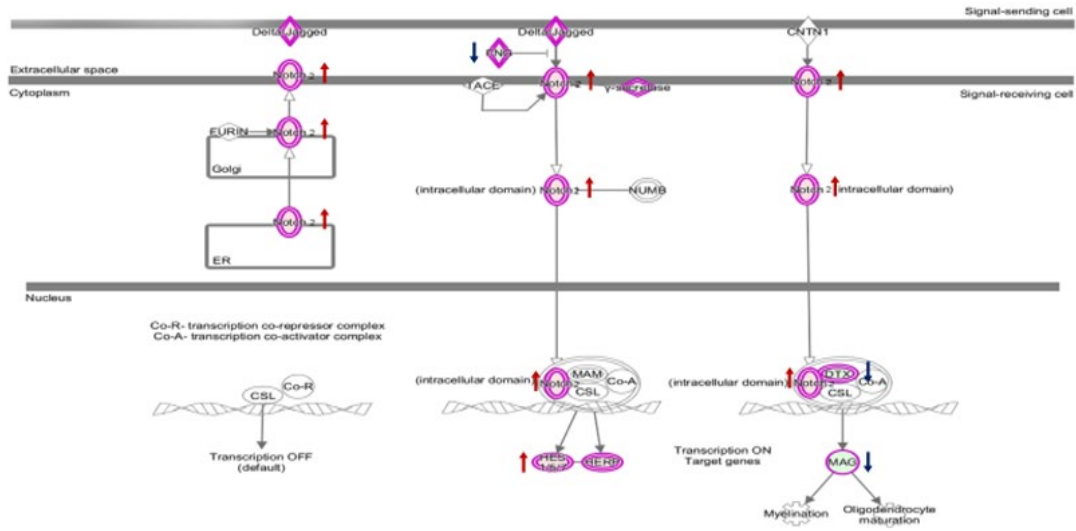

Supplement: Image_1.pdf [file Image_1.pdf]
