# Supplementary material for: DAPT, a γ-Secretase Inhibitor, Suppresses Tumorigenesis, and Progression of Growth Hormone-Producing Adenomas by Targeting Notch Signaling
Source: PubMed Central journal article supplement (PMC6718711; doi:10.3389/fonc.2019.00809), 2019-08-27

**Figure S2** Effects of different shRNA against Notch2 on protein expression in GH3 cells.

A: Western blots. B: Bands densities.

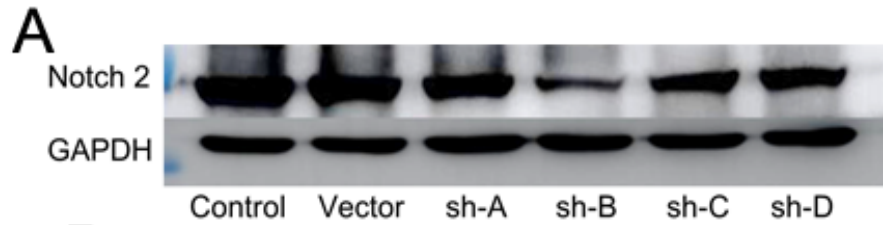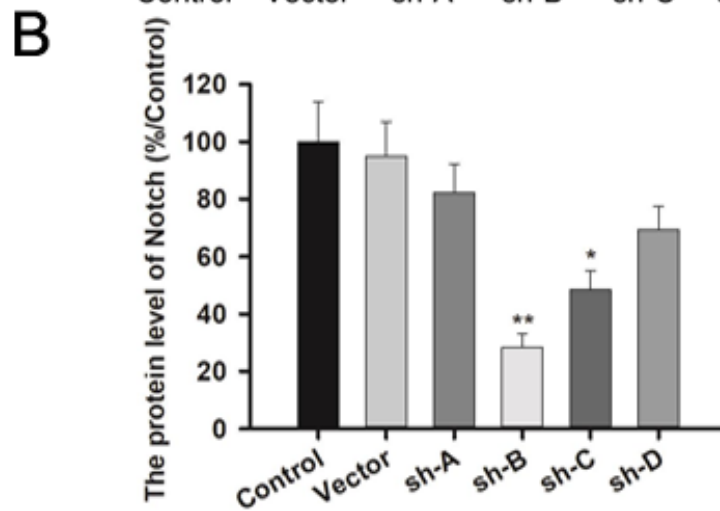

Supplement: Image_2.pdf [file Image_2.pdf]
