# Supplementary material for: DAPT, a γ-Secretase Inhibitor, Suppresses Tumorigenesis, and Progression of Growth Hormone-Producing Adenomas by Targeting Notch Signaling
Source: PubMed Central journal article supplement (PMC6718711; doi:10.3389/fonc.2019.00809), 2019-08-27

**Figure S3** The Effect of shRNA or DAPT treatment on GH3 cells. A. Control, B: Vector C: shRNA with sh-B, D: DAPT (20nM).

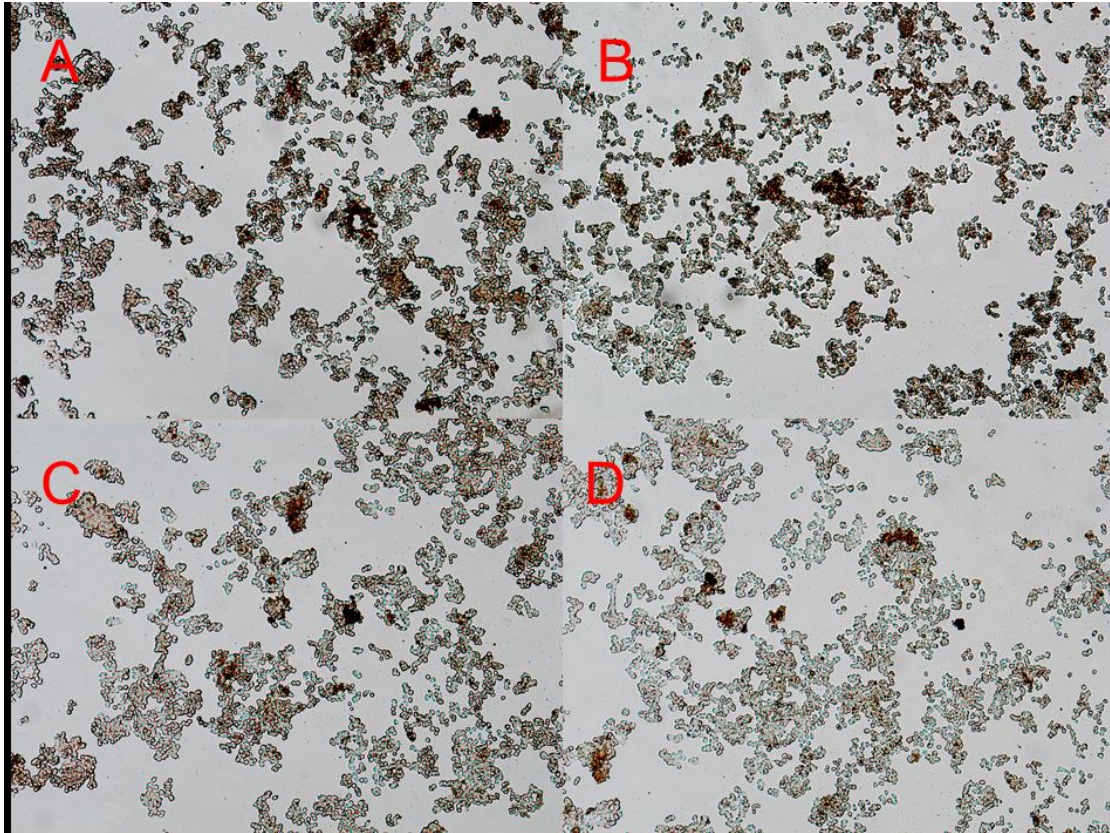

Supplement: Image_3.pdf [file Image_3.pdf]
